# Supplementary material for: Probing the potential of CdZnTe for high-energy high-flux 2D X-ray detection using the XIDer incremental digital integrating readout
Source: Frontiers journal article supplement (doi:10.3389/fphy.2024.1304570), 2024-02-13
Supplement: Data_Sheet_1.pdf [file Data_Sheet_1.pdf]

## Supplementary material

### Probing the potential of CdZnTe for high-energy high-flux 2D X-ray detection using the XIDer incremental digital integrating readout

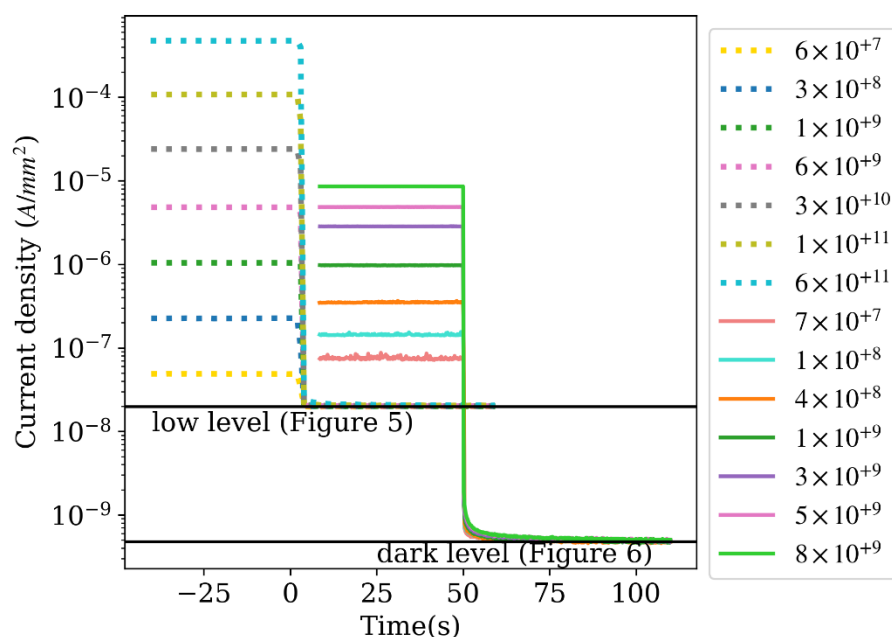

Figure S1. Photocurrent and aftersignal tails of the cycled irradiation measured on sample 1. The dotted line plots correspond to the data displayed in Figure 5. The solid line plots correspond to the data displayed in Figure 6 for the cycled irradiation described in [1]. The flux values in the legend are given in  $\text{ph}/\text{mm}^2/\text{s}$ . The plots are color-coded according to flux values.

- [1] O. Baussens, C. Ponchut, M. Ruat, M. Bettelli, S. Zanettini, and A. Zappettini, 'Characterization of High-Flux CdZnTe with optimized electrodes for 4th generation synchrotrons', *J. Inst.*, vol. 17, no. 11, p. C11008, Nov. 2022, doi: 10.1088/1748-0221/17/11/C11008.
